## Mutation-profile-based methods for understanding selection forces in cancer somatic mutations: a comparative analysis

Zhan Zhou<sup>1,4,\*</sup>, Yangyun Zou<sup>1,\*</sup>, Gangbiao Liu<sup>1</sup>, Jingqi Zhou<sup>1</sup>, Jingcheng Wu<sup>4</sup>, Shimin Zhao<sup>2</sup>, Zhixi Su<sup>1</sup> and Xun Gu<sup>3,1</sup>

<sup>1</sup>Ministry of Education Key Laboratory of Contemporary Anthropology, School of Life Sciences, Fudan University, Shanghai, China

<sup>2</sup>State Key Laboratory of Genetic Engineering, Collaborative Innovation Center of Genetics and Development, School of Life Sciences, Fudan University, Shanghai, China

<sup>3</sup>Department of Genetics, Development and Cell Biology, Program of Bioinformatics and Computational Biology, Iowa State University, Ames, Iowa, USA

<sup>4</sup>College of Pharmaceutical Sciences, Zhejiang University, Hangzhou, China

\*These authors have contributed equally to this work

**Correspondence to:** Zhixi Su, **email:** zxsu@fudan.edu.cn  
Xun Gu, **email:** xgu@iastate.edu

**Keywords:** cancer somatic mutations, mutation profile, natural selection, cancer-associated genes, evolution

**Received:** October 26, 2016

**Accepted:** July 12, 2017

**Published:** July 19, 2017

Copyright: Zhou et al. This is an open-access article distributed under the terms of the Creative Commons Attribution License 3.0 (CC BY 3.0), which permits unrestricted use, distribution, and reproduction in any medium, provided the original author and source are credited.

### ABSTRACT

**Human genes exhibit different effects on fitness in cancer and normal cells. Here, we present an evolutionary approach to measure the selection pressure on human genes, using the well-known ratio of the nonsynonymous to synonymous substitution rate in both cancer genomes ( $C_N/C_S$ ) and normal populations ( $p_N/p_S$ ). A new mutation-profile-based method that adopts sample-specific mutation rate profiles instead of conventional substitution models was developed. We found that cancer-specific selection pressure is quite different from the selection pressure at the species and population levels. Both the relaxation of purifying selection on passenger mutations and the positive selection of driver mutations may contribute to the increased  $C_N/C_S$  values of human genes in cancer genomes compared with the  $p_N/p_S$  values in human populations. The  $C_N/C_S$  values also contribute to the improved classification of cancer genes and a better understanding of the onco-functionalization of cancer genes during oncogenesis. The use of our computational pipeline to identify cancer-specific positively and negatively selected genes may provide useful information for understanding the evolution of cancers and identifying possible targets for therapeutic intervention.**

### INTRODUCTION

Since the pioneering work of Cairns and Nowell [1, 2], the evolutionary concept of cancer progression has been widely accepted [3–7]. In this model, cancer cells evolve through random somatic mutations and epigenetic changes that may alter several crucial pathways, a process that is followed by clonal selection of the resulting cells. Consequently, cancer cells can survive and proliferate under deleterious circumstances [8, 9]. Therefore, knowledge of evolutionary dynamics will benefit our understanding of cancer initiation and progression.

For example, there are two types of somatic mutations in cancer genomes: driver mutations and passenger mutations [10, 11]. Driver mutations are those that confer a selective advantage on cancer cells, as indicated by statistical evidence of positive selection. Passenger mutations do not confer a clonal growth advantage and are usually considered neutral in cancer. However, some passenger mutations in protein-coding regions that would have potentially deleterious effects on cancer cells may be under negative selection in cancer [12, 13].

Cancer somatic mutations, especially driver mutations, promote the cancer specific functionalization

of cancer-associated genes, i.e., onco-functionalization. Onco-functionalization of cancer-associated genes would promote cancer initiation and progression. For example, oncogenes may gain new functions during carcinogenesis, which could be considered cancer-specific neo-functionalization [14]. By contrast, the mutation of tumor suppressor genes to cause a loss or reduction of their function could be considered cancer-specific non-functionalization [15].

Analyses of large-scale cancer somatic mutation data have revealed that the effects of positive selection are much stronger on cancer cells than on germline cells [16, 17]. Given that many of the positively selected genes in tumor development act as the driving force behind tumor initiation and development and are thus considered “driver genes”, it is understandable that almost all previous studies have focused on positively selected genes in cancer genomes [3, 18–21]. Nevertheless, we have realized that an alternative approach, i.e., identifying cancer-constrained genes that are highly conserved in tumor cell populations (under purifying selection), is also valuable. For example, *TP73*, a homolog of *TP53*, is rarely mutated but frequently overexpressed in tumor cells. *TP73* has been reported to activate the expression of glucose-6-phosphate dehydrogenase and support the proliferation of human cancer cells [22]. As essential genes are crucial for carcinogenesis, progression and metastasis, this idea may be advantageous in addressing issues related to drug resistance in cancer therapies, especially in cancers with high intratumor heterogeneity.

Many previous studies have used the ratio of nonsynonymous to synonymous substitution rates to identify genes that might be under strong positive selection both in organismal evolution and carcinogenesis [11, 16, 17, 23–26]. However, most of these studies applied conventional methods, which are usually based on simple nucleotide mutation/substitution models, e.g., the simplest equal-rate model assuming that every mutation or substitution pattern has the same probability [27]. Unfortunately, this may not be a realistic biological model because many recent cancer genomics studies have shown that mutation profiles vary greatly between different cancer samples [17, 28]. In addition, context-dependent mutation bias (i.e., base-substitution profiles that are influenced by the flanking 5' and 3' bases of each mutated base) should also be considered [28, 29].

In this study, we describe a mutation-profile-based method to estimate the selective constraint for each gene in pan-cancer samples and human populations. In brief, the new method discards an unrealistic assumption inherent in the equal-rate model that every mutation or substitution pattern has the same probability [27]. This assumption can lead to nontrivial biased estimations when it is significantly violated. By contrast, our method implements an empirical nucleotide mutation model that simultaneously considers account several factors,

including single-base mutation patterns, local-specific effects of surrounding DNA regions, and tissue/cancer types. Using simple somatic mutations from 9,155 tumor-normal paired whole-exome/genome sequences (ICGC Release 20), as well as rare germline substitutions from 6,500 exome sequences from the National Heart, Lung, and Blood Institute (NHLBI) Grant Opportunity (GO) Exome Sequencing Project (ESP), as references, we used this mutation-profile-based method to identify selective constraints on human genes, especially cancer-associated genes, in cancer cells. Our results may provide useful information for the precise classification of known cancer-associated genes and for an improved understanding of the evolution of cancers.

## RESULTS

### The mutation rate profiles in cancer genomes and human populations differ

Estimating evolutionary selective pressure on human genes is a practical method for inferring the functional importance of genes in a specific population. By comparing selective pressures, we may be able to identify different functional and fitness effects of human genes in cancer and normal cells. The conventional method for measuring selective pressure is to calculate the ratio of nonsynonymous to synonymous substitution rates using the equal-rate method [27], which assumes equal substitution rates among different nucleotides. In this study, we used the cancer somatic mutations from 9,155 tumor-normal pairs from ICGC (Release 20) as well as rare variants (minor allele frequency < 0.01%) from 6,500 exome sequences from ESP as a reference. We used these data to compare the empirical mutation rate profiles of cancer somatic mutations and germline substitutions using 96 substitution classifications [28, 29]. The empirical mutation rate profiles reveal the prevalence of each substitution pattern for point mutations and present not only the substitution types but also the sequence context (see Methods). The exonic mutation profiles of cancer somatic mutations and germline substitutions are both enriched in C-to-T transitions (Figure 1). The mutation rates for each trinucleotide context differ from each other, and the ratio of transition to transversion for each trinucleotide context is much greater than 1:2 for both cancer somatic mutations (ratio =  $2.70 \pm 0.47$ ) and germline rare variants (ratio =  $3.28 \pm 0.53$ ) (Supplementary Figure 1). These different mutation profiles may lead to different biological progressions in carcinogenesis, as depicted in several publications [19, 28]. For example, the mutation profiles of melanoma are highly enriched in C-to-T transitions, indicating a direct mutagenic role of ultraviolet (UV) light in melanoma pathogenesis [30]. Thus, it is inappropriate to use conventional methods such as the equal-rate model to measure selective pressure

because this approach ignores the mutation bias of different nucleotide substitution types.

### Measuring selective pressure on human genes in cancer and germline cells using the mutation-profile-based method

We therefore formulated an evolutionary approach that was designed specifically to estimate the selective pressure imposed on human genes in cancer cells and then identify genes that had undergone positive and purifying selection in cancer cells compared with in normal cells (see Figure 2 for an illustration). In cancer genomics, distinguishing synonymous from nonsynonymous somatic mutations is straightforward. We developed the mutation-profile-based method to estimate the  $C_N/C_S$  ratio of each human gene based on the mutation profiles of cancer somatic mutations and the  $p_N/p_S$  ratio for germline substitutions. In contrast to the equal-rate method [27], our method considers differences in substitution rates and uses the overall mutation rate profile as the weight matrix (Figure 1).

We calculated the expected number of nonsynonymous and synonymous sites based on the exonic mutation rate profiles. We then counted the number

of nonsynonymous and synonymous substitutions in the protein-coding region of each human gene for all cancer somatic mutations or germline substitutions. A  $\chi^2$  test was performed to identify the genes whose  $C_N/C_S$  values were either significantly greater than one or less than one, which indicates positive or negative (purifying) selection, respectively. Of the 16,953 genes with at least one germline substitution and cancer somatic mutation, the overall  $C_N/C_S$  value for cancer somatic mutations (mean  $\pm$  s.e. =  $1.199 \pm 0.008$ ) was much greater than the overall  $p_N/p_S$  of germline substitutions (mean  $\pm$  s.e. =  $0.738 \pm 0.005$ ) (Wilcoxon test,  $p < 2.2 \times 10^{-16}$ ) (Table 1A, Supplementary Table 1). In the cancer genomes, 365 genes had  $C_N/C_S$  values significantly greater than one, and 923 genes had  $C_N/C_S$  values significantly less than one ( $\chi^2$  test,  $p < 0.01$ , FDR  $< 0.1$ ). By contrast, germline substitutions included only 24 genes with  $p_N/p_S$  values significantly greater than one, whereas 4,897 genes had  $p_N/p_S$  values significantly less than one ( $\chi^2$  test,  $p < 0.01$ , FDR  $< 0.1$ ). Of these 365 cancer positively selected genes, only one gene (*RSRC1*) also exhibited positive selection whereas 117 genes exhibited negative selection in germline substitutions. Additionally, 500 cancer negatively selected genes did not exhibit significant negative selection in germline substitutions. These genes may therefore be

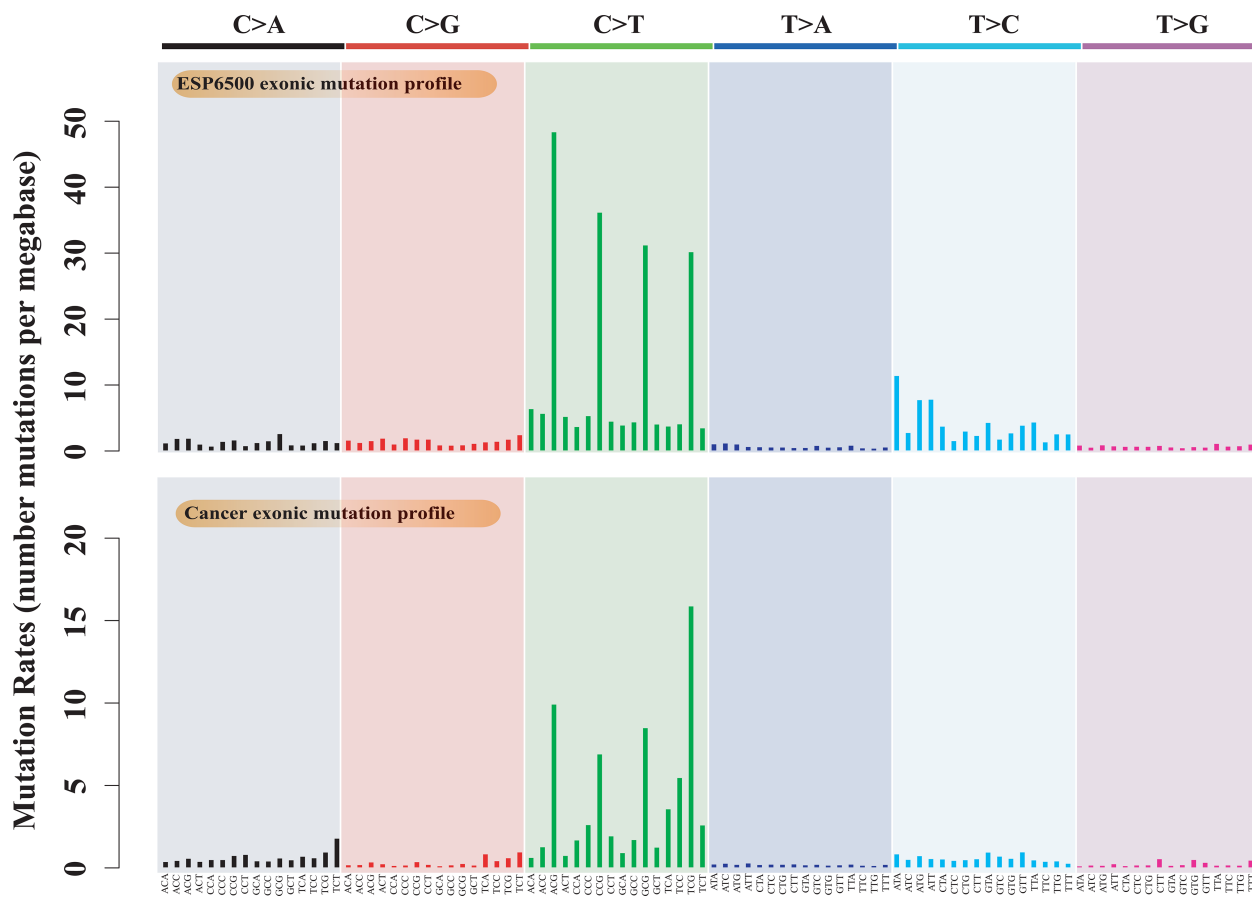

Figure 1: Mutation profiles of cancer somatic mutations and germline substitutions, including the exonic mutation profile of 9,155 cancer samples and the exonic mutation profile of ESP6500.

under different selective pressure in cancer and germline genomes.

Previous studies have attributed elevated  $C_N/C_S$  values to the relaxation of purifying selection [16] or increased positive selection of globally expressed genes [17]. Our results show that the number of genes under positive selection increased, whereas the number of genes under negative selection decreased, in cancer genomes compared with germline genomes. This result indicates that both the relaxation of purifying selection on passenger mutations and the positive selection of driver mutations may contribute to the increased  $C_N/C_S$  values of human genes in cancer genomes.

### Selection pressures on cancer-associated genes

The Cancer Gene Census (CGC) [31, 32] contains more than 500 cancer-associated genes that have been reported in the literature to exhibit mutations and that are causally implicated in cancer development. Of those genes, 553 were included in the 16,953 genes that we tested. These known cancer genes have significantly greater  $C_N/C_S$  values (Wilcoxon test,  $p = 2.9 \times 10^{-10}$ ) for cancer somatic mutations but significantly lower  $p_N/p_S$  values for germline substitutions (Wilcoxon test,

$p < 2.2 \times 10^{-16}$ ) than other genes (Table 1A). For selection over longer evolutionary time scales, we extracted the  $d_N/d_S$  values between human-mouse orthologs from the Ensembl database (Release 75) [33]. The known cancer genes have significantly lower human-mouse  $d_N/d_S$  values than other human genes (Wilcoxon test,  $p < 2.2 \times 10^{-16}$ ). These results support the work of Thomas *et al.* [34], who showed that known cancer genes may be more constrained and more important than other genes at the species and population levels, especially for oncogenes. By contrast, known cancer genes are more likely to gain onco-functional somatic mutations in cancer than other genes.

Among the 365 cancer positively selected genes, 45 (12.3%) genes are known cancer genes, indicating that cancer genes are significantly enriched in cancer positively selected genes (Fisher's Exact Test,  $p = 6.7 \times 10^{-15}$ ). When we choose a more stringent cut-off of  $p < 10^{-5}$ , 17 of the 29 (58.6%) positively selected genes are known cancer genes, according to the CGC, and the work of Lawrence *et al.* [20] and Kandath *et al.* [35], such as the well-known cancer drivers *TP53*, *KRAS*, *PIK3CA*, and *BRAF*. (Supplementary Table 2). In addition, the 29 strong positively selected genes are significantly enriched in biological processes related to cancer, according to the functional analysis using DAVID

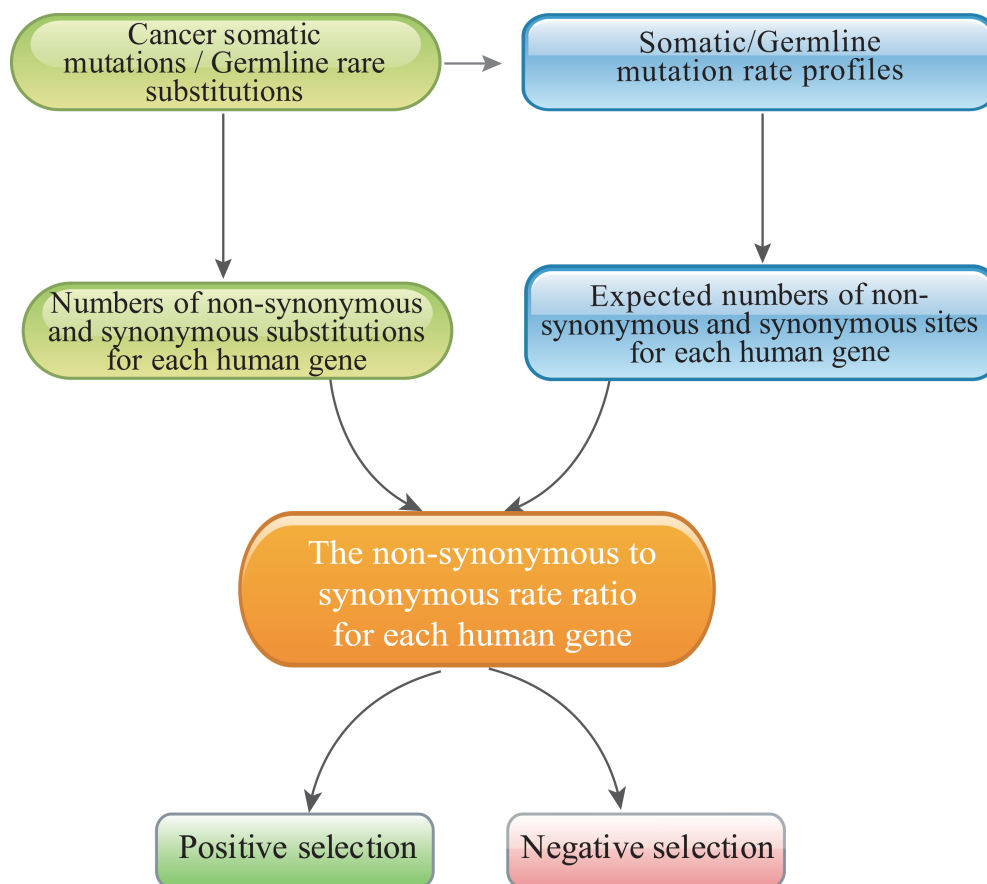

**Figure 2: The pipeline used to identify positively and negatively selected cancer genes with the mutation-profile-based method.**

v6.7 [36] (Supplementary Table 3). Some cancer genes also show negative selection in cancer genomes, such as the oncogene *MLL3* ( $C_N/C_S = 0.11$ ,  $p = 3.14 \times 10^{-44}$ ,  $FDR = 5.52 \times 10^{-41}$ ). The *MLL-MLL3* gene fusion is the main mutation type of *MLL3* that drives tumorigenesis in acute leukemia [37]. Interestingly, *MLL3* has recurrent synonymous mutations at amino acid positions 166 to 168 (S166S, 8/9155; S167S, 33/9155; S168S, 23/9155).

Using the  $C_N/C_S$  values, we classified known cancer genes according to the selection pressure on these genes in cancer cells, as well as their onco-functionalization in oncogenesis (Table 2). The most important two classes are oncogenes and tumor suppressor genes that are under strong positive selection, such as *TP53*, the most famous tumor suppressor gene [38], which shows strong positive selection pressure ( $C_N/C_S = 32.57$ ,  $p = 1.06 \times 10^{-159}$ ,  $FDR = 6.55 \times 10^{-156}$ ). The non-synonymous mutations of *TP53* with onco-nonfunctionalization are distributed in a wide range of cancers. The oncogene *KRAS* [39] also showed a strong positive selection pressure ( $C_N/C_S = 45.88$ ,  $p = 4.25 \times 10^{-87}$ ,  $FDR = 1.74 \times 10^{-83}$ ). Recurrent non-synonymous mutation with onco-neofunctionalization of *KRAS* are highly enriched in codons 12 and 13; mutations in these codons represent 79.4% and 8.0% of all non-synonymous mutations of *KRAS*.

We also observed 12 cancer positively selected genes ( $p < 10^{-5}$ ) that have not been reported as cancer-associated genes. These genes are recurrently mutated in several tumor types and are potential cancer driver genes. According to the mouse insertional mutagenesis experiments [40], three of these genes (*DMD*, *MYO9A*, and *COL5A2*) have been identified as cancer-causing genes [41–44].

When we chose a more stringent cut-off of  $p < 10^{-5}$  for cancer negatively selected genes, we found 112 genes that showed an enrichment in the Notch signaling pathway (Supplementary Table 3). Forty-seven of the 112 negatively selected genes showed more stringent selective constraint in cancer cells than in normal cells ( $p_N/p_S > C_N/C_S$ ,  $p > 0.05$  for  $p_N/p_S$ ). It would be quite valuable to uncover the roles of these evolutionarily conserved genes in cancer cells. Out of the 47 genes, 14 genes showed a significantly increased expression level in cancers than in normal tissues (fold change  $> 2$ ,  $p < 10^{-4}$ ) (Supplementary Table 4). For example, *SPRR3*, a member of the small proline-rich protein family, is under purifying selection in cancer cells ( $C_N/C_S = 0.27$ ,  $p = 5.73 \times 10^{-11}$ ,  $FDR = 1.91 \times 10^{-8}$ ) and neutral selection in germline cells ( $p_N/p_S = 0.88$ ,  $p = 0.75$ ,  $FDR = 0.37$ ). It has been reported that *SPRR3* is overexpressed in several tumor types, and is associated with tumor cell proliferation and invasion. Therefore, *SPRR3* could be a potential biomarker and novel therapeutic target [45–47].

We also examined essential genes during human development and cancer development. We extracted 2,452 human orthologs of mouse essential genes from DEG10

(the Database of Essential Genes) [48]. These genes, which are human orthologs of known essential genes in mice [49], are critical for cell survival and are therefore more conserved than other genes at the species and population levels. Here, we found that human orthologs of mouse essential genes have significantly lower  $d_N/d_S$  values (measured between human-mouse orthologs) and lower  $p_N/p_S$  values for germline substitutions but similar  $C_N/C_S$  values for cancer somatic mutations compared with the values for non-essential genes (Table 1A). Human orthologs of mouse essential genes are also enriched among cancer positively selected genes. Eighteen of the twenty-nine (62.1%) positively selected genes ( $p < 10^{-5}$ ) are human orthologs of mouse essential genes (Supplementary Table 2). We also used the human orthologs of mouse essential genes from OGEE (the database of Online GENE Essentiality) [50] to confirm these results (Supplementary Table 2).

Cancer essential genes were identified by performing genome-scale pooled RNAi screens. RNAi screens with the 45k shRNA pool in 12 cancer cell lines, including small-cell lung cancer, non-small-cell lung cancer, glioblastoma, chronic myelogenous leukemia, and lymphocytic leukemia, revealed 268 common essential genes [51]. Compared to other human genes, these cancer essential genes have significantly lower  $d_N/d_S$  values and lower  $p_N/p_S$  values for germline substitutions and greater  $C_N/C_S$  values for cancer somatic mutations (Table 1A), suggesting a functional shift of these genes in human populations and cancer cells.

We further tested the correlations of the  $d_N/d_S$ ,  $p_N/p_S$  and  $C_N/C_S$  values of human genes for human-mouse orthologs, germline substitutions and cancer somatic mutations to compare selective pressures among species, populations and cancer cells (Table 1B). For different gene sets, the  $d_N/d_S$  values show a weak positive correlation with the  $p_N/p_S$  values, but no significant correlation with  $C_N/C_S$  values. The  $p_N/p_S$  values and  $C_N/C_S$  values also do not have significant correlation for different gene sets. These results indicate that the cancer-specific selection pressure is quite different from the selection pressure at the species and population levels.

### Selection pressure among different cancer types

As cancer is highly heterogeneous, we further analyzed the selection pressure of human genes in different cancer types. The 9,155 tumor samples from the ICGC database could be classified as 20 cancer types according to the primary site. The overall  $C_N/C_S$  values for the cancer somatic mutations in the different cancer types ranged from  $1.078 \pm 0.022$  to  $1.827 \pm 0.013$  (mean  $\pm$  s.e., Table 3). The detected positively and negatively selected genes ( $\chi^2$  test,  $p < 0.01$ ) varied in the different cancer types (Supplementary Table 5). Due to the limited number of tumor samples and somatic mutations for each cancer type, particularly in the

**Table 1: The  $\omega$  ratios ( $d_N/d_S$ ,  $p_N/p_S$ ,  $C_N/C_S$  values) (A) and the correlations of the  $\omega$  ratios (B) for the different gene sets for the human-mouse orthologs and for germline and cancer somatic mutations (A)**

|                           | $d_N/d_S$     | $p_N/p_S$     | $C_N/C_S$     |
|---------------------------|---------------|---------------|---------------|
| All genes                 | 0.154 ± 0.006 | 0.738 ± 0.005 | 1.199 ± 0.008 |
| Known cancer genes        | 0.106 ± 0.005 | 0.537 ± 0.014 | 1.550 ± 0.116 |
| Oncogenes                 | 0.088 ± 0.009 | 0.473 ± 0.029 | 1.940 ± 0.508 |
| Tumor suppressor genes    | 0.121 ± 0.017 | 0.545 ± 0.037 | 1.994 ± 0.497 |
| Human essential genes     | 0.092 ± 0.002 | 0.559 ± 0.007 | 1.217 ± 0.032 |
| Cancer essential genes    | 0.090 ± 0.008 | 0.587 ± 0.030 | 1.465 ± 0.190 |
| Positively selected genes | 0.137 ± 0.007 | 0.757 ± 0.029 | 3.264 ± 0.198 |
| Negatively selected genes | 0.129 ± 0.004 | 0.600 ± 0.012 | 0.471 ± 0.005 |

(B)

|                           | $d_N/d_S$ vs $p_N/p_S$ |                           | $d_N/d_S$ vs $C_N/C_S$ |                 | $p_N/p_S$ vs $C_N/C_S$ |                           |
|---------------------------|------------------------|---------------------------|------------------------|-----------------|------------------------|---------------------------|
|                           | <i>r</i>               | <i>p</i> -value           | <i>r</i>               | <i>p</i> -value | <i>r</i>               | <i>p</i> -value           |
| All genes                 | 0.03                   | 6.6 × 10 <sup>-5</sup>    | 0.00                   | 0.80            | 0.09                   | < 2.2 × 10 <sup>-16</sup> |
| Known cancer genes        | 0.38                   | < 2.2 × 10 <sup>-16</sup> | -0.01                  | 0.87            | -0.04                  | 0.36                      |
| Oncogenes                 | 0.12                   | 0.23                      | -0.01                  | 0.94            | -0.05                  | 0.65                      |
| Tumor suppressor genes    | 0.34                   | 3.5 × 10 <sup>-3</sup>    | 0.02                   | 0.86            | -0.07                  | 0.56                      |
| Human essential genes     | 0.32                   | < 2.2 × 10 <sup>-16</sup> | 0.01                   | 0.58            | 0.04                   | 0.06                      |
| Cancer essential genes    | 0.20                   | 1.4 × 10 <sup>-3</sup>    | -0.02                  | 0.73            | -0.04                  | 0.50                      |
| Positively selected genes | 0.34                   | 1.0 × 10 <sup>-10</sup>   | -0.02                  | 0.67            | 0.13                   | 0.01                      |
| Negatively selected genes | 0.35                   | < 2.2 × 10 <sup>-16</sup> | -0.04                  | 0.22            | -0.07                  | 0.03                      |

The positively and negatively selected genes indicates the genes that are under positive and negative selection in cancer cells, respectively ( $\chi^2$  test,  $p < 0.01$ , FDR < 0.1).

**Table 2: Classification of cancer genes according to cancer-specific selection pressures**

|                        | #Positive selection | #Negative selection | #Neutral |
|------------------------|---------------------|---------------------|----------|
| Known cancer genes     | 45                  | 29                  | 479      |
| Oncogenes              | 11                  | 7                   | 79       |
| Tumor suppressor genes | 10                  | 6                   | 54       |

cancer types with low mutation rates, our method might not be sensitive enough to detect the selection pressure for each gene. For example, only one positively selected gene was detected in bone cancer (*IDH1*) and nervous system cancer (*ALK*), respectively. There were also three genes (*TP53*, *PIK3CA* and *KRAS*) that showed positive selection in more than five cancer types. In particular, *TP53* showed positive selection in 15 cancer types. On the other hand, more genes (164/188, 87.2%) were under positive selection in only one cancer type. We also found that six genes (*TBP*, *EP400*, *DSPP*, *MUC21*, *MLLT3*, and *MUC2*) were under negative selection in more than five cancer types. These genes also

showed negative selection at the species and population levels. Furthermore, 85.8% (2,417/2,817) of genes showed negative selection in only one cancer type. These results indicate the divergence of selection pressure in different cancer types.

### Comparison of the equal-rate model and empirical mutation profile model

Considering that different nucleotide substitution models might provide varying estimates, we used the equal-rate method [27] as the simplest model to calculate

**Table 3: The selection pressure in different cancer types**

| Cancer type           | #Samples | $C_N/C_S$     | #Positive selection | #Negative selection |
|-----------------------|----------|---------------|---------------------|---------------------|
| Bladder cancer        | 233      | 1.389 ± 0.010 | 5                   | 99                  |
| Blood cancer          | 686      | 1.145 ± 0.014 | 4                   | 86                  |
| Bone cancer           | 164      | 1.078 ± 0.022 | 1                   | 0                   |
| Brain cancer          | 797      | 1.392 ± 0.021 | 10                  | 57                  |
| Breast cancer         | 1072     | 1.589 ± 0.012 | 15                  | 105                 |
| Cervix cancer         | 194      | 1.402 ± 0.011 | 3                   | 67                  |
| Colorectal cancer     | 443      | 1.563 ± 0.014 | 41                  | 472                 |
| Esophagus cancer      | 347      | 1.350 ± 0.012 | 4                   | 67                  |
| Gall bladder cancer   | 239      | 1.251 ± 0.010 | 2                   | 57                  |
| Head and neck cancer  | 521      | 1.315 ± 0.012 | 10                  | 256                 |
| Kidney cancer         | 668      | 1.381 ± 0.010 | 2                   | 70                  |
| Liver cancer          | 966      | 1.551 ± 0.011 | 10                  | 125                 |
| Lung cancer           | 224      | 1.410 ± 0.011 | 11                  | 141                 |
| Nervous system cancer | 108      | 1.585 ± 0.134 | 1                   | 0                   |
| Ovary cancer          | 181      | 1.244 ± 0.010 | 1                   | 13                  |
| Pancreas cancer       | 685      | 1.333 ± 0.014 | 5                   | 81                  |
| Prostate cancer       | 499      | 1.232 ± 0.011 | 3                   | 41                  |
| Skin cancer           | 584      | 1.148 ± 0.011 | 45                  | 1303                |
| Stomach cancer        | 298      | 1.560 ± 0.013 | 20                  | 163                 |
| Uterus cancer         | 246      | 1.827 ± 0.013 | 56                  | 135                 |

the expected numbers of nonsynonymous and synonymous sites. The overall  $C_N/C_S$  value for cancer somatic mutations (mean ± s.e. = 0.892 ± 0.006) is greater than the  $p_N/p_S$  value for germline substitutions (mean ± s.e. = 0.633 ± 0.004) for the 16,953 genes (Supplementary Table 1) but lower than that calculated using the mutation-profile-based method (Wilcoxon test,  $p < 2.2 \times 10^{-16}$ ) (Figure 3A). Consequently, the number of genes with  $C_N/C_S$  values  $> 1$  ( $\chi^2$  test,  $p < 0.01$ , FDR  $< 0.1$ ) is much lower than those calculated using the exonic mutation profiles (37 versus 365), whereas the number of genes with  $C_N/C_S$  values  $< 1$  ( $\chi^2$  test,  $p < 0.01$ , FDR  $< 0.1$ ) is much greater (2851 versus 923) (Figure 3B and 3C).

We also used the intergenic mutation rate profile from 2,900 tumor-normal whole genome sequences, which are included in the 9,155 cancer samples of ICGC database, to calculate the  $C_N/C_S$  value for cancer somatic mutations. The overall  $C_N/C_S$  value (mean ± s.e. = 1.503 ± 0.010) is greater than that calculated from the exonic mutation rate profile (mean ± s.e. = 1.199 ± 0.008) (Wilcoxon test,  $p < 2.2 \times 10^{-16}$ ), resulting in more positively selected genes (1526 versus 365) and fewer negatively selected genes (298 versus 923) (Figure 3B and 3C).

The equal-rate method ignores the mutation rate bias between different substitution types, especially the ratio of transition to transversion, leading to underestimation of the

$C_N/C_S$  ratio. Therefore, the equal-rate method is strict for positive selection detection but relaxed for the detection of negative selection [52]. In contrast, the mutation-profile-based method considers the mutation bias, which can be depicted as the internal variance between mutation rates of different substitution types. Thus, the mutation-profile-based method can correct the underestimation of the  $C_N/C_S$  ratio estimated by the equal-rate method. Furthermore, the mutation-profile-based method would also increase the false-positive results for detecting positively selected genes but be more conservative in detecting negatively selected genes. The mutation bias may simulate the detection of genes under strong selection pressure but may suppress the detection of genes under weak selection pressure.

## DISCUSSION

A key goal of cancer research is to identify cancer-associated genes, such as oncogenes and tumor suppressor genes, that might promote tumor occurrence and progression when mutated [28]. Instead of searching for cancer-causing genes with multiple driver mutations, an alternative approach is to identify cancer essential genes in tumor cell populations because they are crucial for carcinogenesis, progression and metastasis. Cancer

essential genes are important for the growth and survival of cancer cells [51] and are expected to be highly conserved in cancer cells. In this study, we aimed to detect both cancer-specific positively and negatively selected genes using a molecular evolution approach.

Based on analyses of large-scale cancer somatic mutation data derived from The Cancer Genome Atlas (TCGA) or International Cancer Genome Consortium (ICGC), previous studies identified important differences between the evolutionary dynamics of cancer somatic cells and whole organisms [6, 16, 18]. However, these studies applied canonical nucleotide substitution models to identify the molecular signatures of natural selection in cancer cells or human populations and neglected the apparently different mutation profiles of these cell types. Here, we developed a new mutation-profile-based method

to calculate the  $C_N/C_S$  values of human genes for cancer somatic mutations. In our results, a large number of known cancer genes did not show significant positive selection according to our analysis. One possible reason for this finding suggests that positive selection for driver mutations is obscured by the relaxed purifying selection of passenger mutations. Additionally, among the strong positively selected genes, more than half are known cancer genes. Another possible reason might be that the main mutation type of more than 300 cancer-associated genes is translocation or copy number variation, rather than point mutation. Furthermore, some of the positively selected genes might also be related to cancer, such as *DMD*, *MYO9A*, and *COL5A2*, which have been identified as cancer-causing genes based on mouse insertional mutagenesis experiments [40].

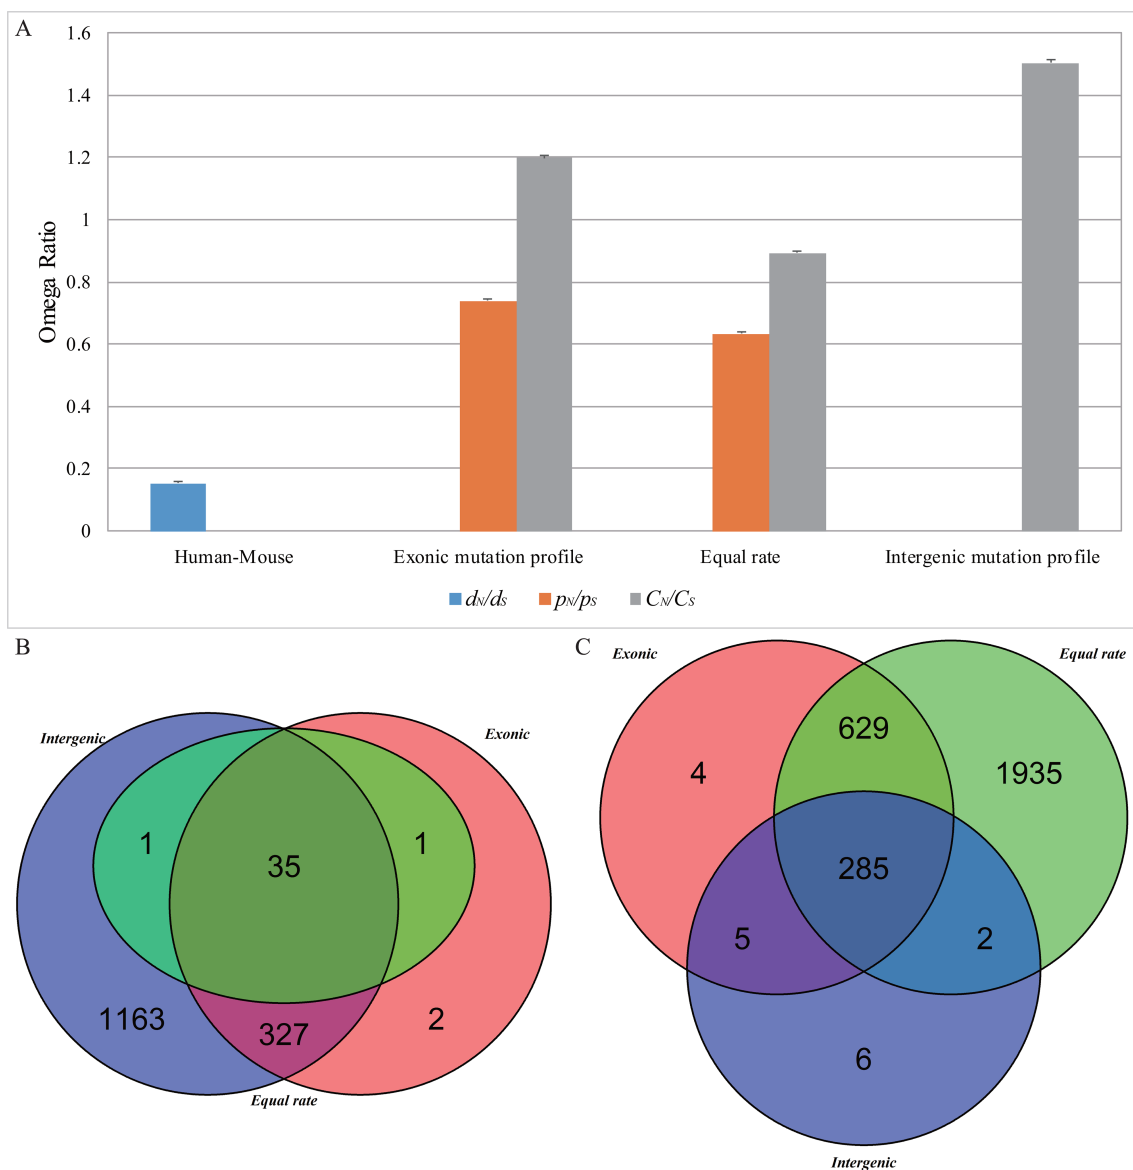

**Figure 3:** The overall omega ratio (A) and overlap of cancer positively selected (B) and negatively selected (C) genes based on different models.



Two prerequisites are crucial to properly apply the mutation-profile-based method. First, a large number of samples with similar mutation profiles are necessary to increase the power of selection pressure detection. Second, a subset of nucleotide substitutions should be chosen to represent the background neutral mutation profiles of the samples. In this study, because of the limited number of cancer samples, especially the number of whole-genome sequenced tumor-normal tissue pairs, we pooled all samples to analyze pan-cancer-level selection pressures. However, cancer somatic mutation profiles are well known to be heterogeneous among different cancer types, even for samples with the same tissue origin [19, 20, 28, 35]. As the number of sequenced cancer genomes increases, we will be able to classify cancer samples by their specific mutation profiles and infer evolutionarily selective pressures more precisely using the mutation-profile-based method.

Background neutral mutation profiles can be calculated based on intergenic regions from the corresponding samples. In this study, we assumed that most of the exonic somatic mutations in the cancer samples do not have significant effects on the fitness of cancer cells. Under this assumption, we can apply the mutation profiles of coding regions to approximate the background. The exonic mutation profiles used in our mutation-profile-based method considered the weight of the 96 substitution classifications within the cancer exomes, which may reflect the mutation bias of different substitution types within the protein-coding regions. This method would correct the underestimation of the  $C_N/C_S$  value that occurs with the equal-rate method [52]. The mutation-profile-based method is more sensitive for the detection of positive selection but more conservative for the detection of negative selection compared with the equal-rate method. As more tumor-normal whole genome sequence data become available, it would be better to choose suitable mutation profiles for the mutation-profile-based method. With the expansion of these data in the future, we may apply more precise methods to identify neutral background mutation properties.

## MATERIALS AND METHODS

### Datasets

Cancer somatic mutation data from 9,155 cancer samples corresponding to 20 primary sites were extracted from the ICGC Data Portal (<http://dcc.icgc.org>, Release 20), which includes 36,985,985 somatic mutations and small insertions/deletions. Data on rare human protein-coding variants (minor allele frequency < 0.01%) from 6,500 human exomes (ESP6500) were extracted from the NHLBI GO Exome Sequencing Project (<http://evs.gs.washington.edu/EVS>, Exome Variant Server NGSPE, Seattle, WA). A total of 572 known cancer genes were

extracted from the Cancer Gene Census (<http://cancer.sanger.ac.uk/cancergenome/projects/census/>, COSMIC v72) [31, 32].

Human gene sequences and annotations were extracted from the Ensembl database (GRCh37, Release 75) [33]. For each gene, only the longest transcript was selected for the subsequent analyses. The  $d_N/d_S$  values between human-mouse orthologs were extracted from the Ensembl database. The HGNC (HUGO Gene Nomenclature Committee) database [53] (<http://www.genenames.org/>) and the Genecards database [54] (<http://www.genecards.org>) were used to map the gene IDs from different datasets. DAVID v6.7 was utilized for the functional annotation analysis [36]. ANNOVAR was utilized to perform biological and functional annotations of the cancer somatic mutations and germline substitutions [55]. The Oncomine database [56] (<https://www.oncomine.org>) was used to compare the gene expression level of negatively selected genes between cancer and normal tissues. The human orthologs of mouse essential genes were extracted from the DEG 10 [48] and the OGEE v2 [50] databases.

### Statistical measure for gene-specific selection pressure in cancer evolution ( $C_N/C_S$ )

In cancer genomics, distinguishing synonymous from nonsynonymous somatic mutations is straightforward. Thus, given a set of independent cancer samples, the ratio of nonsynonymous counts (N) to synonymous counts (S) of a gene, denoted by  $N/S$ , is simply given by the sum over all samples, under the assumption of no double mutations at the same nucleotide site (e.g., for the observed mutation  $A > C$ , the mutation path  $A > G > C$  is almost impossible in cancers). To further explore the underlying mechanisms, the  $N/S$  ratio must be normalized by  $L_N/L_S$ , that is,

$$C_N/C_S = (N/L_N)/(S/L_S) = q_N/q_S \quad (1)$$

where  $L_N$  is the number of expected nonsynonymous sites and  $L_S$  is the number of expected synonymous sites. Note that  $C_N/C_S$  is specific for cancer somatic mutations, to avoid notation confusions with  $d_N/d_S$  in molecular evolution and  $p_N/p_S$  in population genetics. To avoid a calculation error for the small sample size, 0.5 was added to each parameter for the calculation of  $C_N/C_S$  if N or S was equal to zero.

The calculation of  $L_N$  and  $L_S$  from the nucleotide sequence is not a trivial task. For instance, in the codon TTT (coding for amino acid Phe), the first two positions are counted as nonsynonymous sites because no synonymous changes can occur at these positions. At the third position, the transition change ( $T > C$ ) is synonymous, whereas the remaining two transversion changes ( $T > A$  and  $T > G$ ) are nonsynonymous. Apparently, the weight of the third position of codon TTT as synonymous ( $w_S$ ) or nonsynonymous ( $w_N$ ) depends on the pattern of somatic mutations. At one extreme, if the transition mutation

is dominant, this position should nearly be counted as a synonymous site ( $w_s = 1$ ); at the other extreme (transversion dominant), this position would be counted as a nonsynonymous site ( $w_s = 0$ ).

### Equal-rate model

The weight of a nucleotide as synonymous ( $w_s$ ) is simple when the rate of base change is the same. Let  $I_s$  be the number of possible synonymous changes at a site. This is counted as  $w_s = I_s/3$  synonymous and  $(1 - I_s/3)$  nonsynonymous. For instance, in the codon TTT (Phe), the first two positions are counted as nonsynonymous sites because no synonymous changes can occur at these positions ( $w_s = 0$ ). The third position of codon TTT is then counted as one third of a synonymous site ( $w_s = 1/3$ ) and two-thirds of a nonsynonymous site ( $w_N = 2/3$ ) because only one of the three possible changes is synonymous. It is then straightforward to calculate the numbers of synonymous and nonsynonymous sites.

### Empirical mutation profile model

Substantial evidence has demonstrated that the rate of somatic mutations in cancer depends on not only the nucleotide site (e.g., synonymous or nonsynonymous sites) and the mutation type (e.g., transition or transversion) but also on the sequence context of each mutated site, i.e., the effects of near-by nucleotides on somatic mutations are nontrivial. Recent studies [28, 29, 57] proposed an empirical mutation profile of any position with base P, considering two immediate neighbor nucleotides (x, y) of a trinucleotide string denoted by xPy. Since base P has six base-change patterns (under Watson-Crick pairing) and both x and y have four types of bases, there are a total of  $4 \times 6 \times 4 = 96$  substitution classifications, with the empirical profile denoted by  $M(xPy > xP_i^*y)$ , where  $P_i^*$  ( $i = 1, 2, 3$ ) for the other three bases instead of P. To determine the probability of the mutation type ( $xPy > xP_i^*y$ ), we divided the number of mutations in that trinucleotide context ( $xPy > xP_i^*y$ ) by the number of occurrences of the trinucleotide ( $xPy$ ). Our computational pipeline is illustrated by the following example.

In the encoding sequence with two codons ... TTT-ATG..., we consider the third position of codon TTT (Phe). Under the trinucleotide TTA for the mutation profile (not the codon), the corresponding three substitution configurations are given by  $M(TTA > TCA)$ ,  $M(TTA > TAA)$  and  $M(TTA > TGA)$ , respectively, and the number of occurrences of TTA is  $M(TTA)$ . Next, we consider codon TTT. Because TTT and TTC are synonymous codons but TTA and TTG are not, the probabilities that this site will be synonymous and nonsynonymous are simply given by the following:

$$w_s = M(TTA > TCA)/M(TTA)$$
$$w_N = (M(TTA > TGA) + M(TTA > TAA))/M(TTA) \quad (2)$$

We counted all somatic mutations in the protein-coding regions of the 9,155 tumor-normal paired cancer samples, as well as all the rare protein-coding variants of the ESP6500 dataset. The mutation profiles were depicted as the mutation rate of each mutation type according to the 96 substitution classifications.

The ratio of transition to transversion for each trinucleotide context was calculated based on the mutation rate of transitions and transversions. For example, the ratio of transition to transversion for ACA =  $M(ACA > ATA)/(M(ACA > AAA) + M(ACA > AGA))$ .

### Detection of positive and negative selections

The  $\chi^2$  test was used to compare the number of nonsynonymous and synonymous substitutions to the number of nonsynonymous and synonymous sites for each gene to test the statistical significance of the difference between the  $C_N/C_S$  values and one. Genes with  $C_N/C_S$  values significantly greater than one were classified as under positive selection in tumors, whereas genes with  $C_N/C_S$  values significantly less than one were classified as under negative, or purifying, selection. The false-discovery rate was estimated using the qvalue package from Bioconductor [58]. The software tool R was used for statistical analysis (<http://www.r-project.org/>).

### ACKNOWLEDGMENTS

We are grateful to Xiaopu Wang for his help with the manuscript preparation. We would like to thank the NHLBI GO Exome Sequencing Project and its ongoing studies which produced and provided the exome variant calls for comparison: the Lung GO Sequencing Project (HL-102923), the WHI Sequencing Project (HL-102924), the Broad GO Sequencing Project (HL-102925), the Seattle GO Sequencing Project (HL-102926) and the Heart GO Sequencing Project (HL-103010). We also gratefully acknowledge the clinical contributors and data producers from the International Cancer Genome Consortium (ICGC) for referencing the ICGC datasets.

### CONFLICTS OF INTEREST

The authors declare that they have no conflicts of interest.

### GRANT SUPPORT

This work was supported by grants from the National Key Research and Development Program of China (2017YFC0908600), the National Natural Science Foundation of China (31501021), the Zhejiang Provincial Natural Sciences Foundation of China (LY15C060001), the Shanghai Pujiang Program (13PJD005), the China

Postdoctoral Science Foundation (2013M531117), the Fundamental Research Funds for the Central Universities, and the Open Research Funds of the State Key Laboratory of Genetic Engineering, Fudan University.

## REFERENCES

1. Cairns J. Mutation selection and the natural history of cancer. *Nature*. 1975; 255:197–200.
2. Nowell PC. The clonal evolution of tumor cell populations. *Science*. 1976; 194:23–28.
3. Crespi BJ, Summers K. Positive selection in the evolution of cancer. *Biol Rev Camb Philos Soc*. 2006; 81:407–424.
4. Merlo LM, Pepper JW, Reid BJ, Maley CC. Cancer as an evolutionary and ecological process. *Nat Rev Cancer*. 2006; 6:924–935.
5. Podlaha O, Riester M, De S, Michor F. Evolution of the cancer genome. *Trends Genet*. 2012; 28:155–163.
6. Yates LR, Campbell PJ. Evolution of the cancer genome. *Nat Rev Genet*. 2012; 13:795–806.
7. Greaves M, Maley CC. Clonal evolution in cancer. *Nature*. 2012; 481:306–313.
8. Luo J, Solimini NL, Elledge SJ. Principles of cancer therapy: oncogene and non-oncogene addiction. *Cell*. 2009; 136:823–837.
9. Hanahan D, Weinberg RA. Hallmarks of Cancer: The Next Generation. *Cell*. 2011; 144:646–674.
10. Stratton MR, Campbell PJ, Futreal PA. The cancer genome. *Nature*. 2009; 458:719–724.
11. Greenman C, Stephens P, Smith R, Dalgliesh GL, Hunter C, Bignell G, Davies H, Teague J, Butler A, Stevens C, Edkins S, O'Meara S, Vastrik I, et al. Patterns of somatic mutation in human cancer genomes. *Nature*. 2007; 446:153–158.
12. Beckman RA, Loeb LA. Negative clonal selection in tumor evolution. *Genetics*. 2005; 171:2123–2131.
13. McFarland CD, Korolev KS, Kryukov GV, Sunyaev SR, Mirny LA. Impact of deleterious passenger mutations on cancer progression. *Proc Natl Acad Sci USA*. 2013; 110:2910–2915.
14. Croce CM. Oncogenes and cancer. *N Engl J Med*. 2008; 358:502–11.
15. Sherr CJ. Principles of tumor suppression. *Cell*. 2004; 116:235–246.
16. Woo YH, Li WH. DNA replication timing and selection shape the landscape of nucleotide variation in cancer genomes. *Nat Commun*. 2012; 3:1004.
17. Ostrow SL, Barshir R, DeGregori J, Yeger-Lotem E, Hershberg R. Cancer Evolution Is Associated with Pervasive Positive Selection on Globally Expressed Genes. *PLoS Genet*. 2014; 10:e1004239.
18. Davoli T, Xu AW, Mengwasser KE, Sack LM, Yoon JC, Park PJ, Elledge SJ. Cumulative haploinsufficiency and triplosensitivity drive aneuploidy patterns and shape the cancer genome. *Cell*. 2013; 155:948–962.
19. Lawrence MS, Stojanov P, Polak P, Kryukov GV, Cibulskis K, Sivachenko A, Carter SL, Stewart C, Mermel CH, Roberts SA, Kiezun A, Hammerman PS, McKenna A, et al. Mutational heterogeneity in cancer and the search for new cancer-associated genes. *Nature*. 2013; 499:214–218.
20. Lawrence MS, Stojanov P, Mermel CH, Robinson JT, Garraway LA, Golub TR, Meyerson M, Gabriel SB, Lander ES, Getz G. Discovery and saturation analysis of cancer genes across 21 tumour types. *Nature*. 2014; 505:495–501.
21. Chen H, Xing K, He X. The dJ/dS Ratio Test Reveals Hundreds of Novel Putative Cancer Drivers. *Mol Biol Evol*. 2015; 32:2181–2185.
22. Du W, Jiang P, Mancuso A, Stonestrom A, Brewer MD, Minn AJ, Mak TW, Wu M, Yang X. TAP73 enhances the pentose phosphate pathway and supports cell proliferation. *Nat Cell Biol*. 2013; 15:991–1000.
23. Endo T, Ikeo K, Gojobori T. Large-scale search for genes on which positive selection may operate. *Mol Biol Evol*. 1996; 13:685–690.
24. Arbiza L, Dopazo J, Dopazo H. Positive selection, relaxation, and acceleration in the evolution of the human and chimp genome. *PLoS Comput Biol*. 2006; 2:e38.
25. Ovens K, Naugler C. Preliminary evidence of different selection pressures on cancer cells as compared to normal tissues. *Theor Biol Med Model*. 2012; 9:44.
26. Martincorena I, Roshan A, Gerstung M, Ellis P, Van Loo P, McLaren S, Wedge DC, Fullam A, Alexandrov LB, Tubio JM, Stebbings L, Menzies A, Widaa S, et al. Tumor evolution. High burden and pervasive positive selection of somatic mutations in normal human skin. *Science*. 2015; 348:880–886.
27. Nei M, Gojobori T. Simple methods for estimating the numbers of synonymous and nonsynonymous nucleotide substitutions. *Mol Biol Evol*. 1986; 3:418–426.
28. Alexandrov LB, Nik-Zainal S, Wedge DC, Aparicio SA, Behjati S, Biankin AV, Bignell GR, Bolli N, Borg A, Børresen-Dale AL, Boyault S, Burkhardt B, Butler AP, et al, and Australian Pancreatic Cancer Genome Initiative, and ICGC Breast Cancer Consortium, and ICGC MMML-Seq Consortium, and ICGC PedBrain. Signatures of mutational processes in human cancer. *Nature*. 2013; 500:415–421.
29. Samocha KE, Robinson EB, Sanders SJ, Stevens C, Sabo A, McGrath LM, Kosmicki JA, Rehnstrom K, Mallick S, Kirby A, Wall DP, MacArthur DG, Gabriel SB, et al. A framework for the interpretation of de novo mutation in human disease. *Nat Genet*. 2014; 46:944–950.
30. Hodis E, Watson IR, Kryukov GV, Arold ST, Imielinski M, Theurillat JP, Nickerson E, Auclair D, Li L, Place C, Dicara D, Ramos AH, Lawrence MS, et al. A landscape of driver mutations in melanoma. *Cell*. 2012; 150:251–263.

31. Futreal PA, Coin L, Marshall M, Down T, Hubbard T, Wooster R, Rahman N, Stratton MR. A census of human cancer genes. *Nat Rev Cancer*. 2004; 4:177–183.
32. Forbes SA, Bindal N, Bamford S, Cole C, Kok CY, Beare D, Jia M, Shepherd R, Leung K, Menzies A, Teague JW, Campbell PJ, Stratton MR, et al. COSMIC: mining complete cancer genomes in the Catalogue of Somatic Mutations in Cancer. *Nucleic Acids Res*. 2011; 39:D945–950.
33. Flicek P, Amode MR, Barrell D, Beal K, Billis K, Brent S, Carvalho-Silva D, Clapham P, Coates G, Fitzgerald S, Gil L, Giron CG, Gordon L, et al. Ensembl 2014. *Nucleic Acids Res*. 2014; 42:D749–755.
34. Thomas MA, Weston B, Joseph M, Wu W, Nekrutenko A, Tonellato PJ. Evolutionary dynamics of oncogenes and tumor suppressor genes: higher intensities of purifying selection than other genes. *Mol Biol Evol*. 2003; 20:964–968.
35. Kandath C, McLellan MD, Vandin F, Ye K, Niu B, Lu C, Xie M, Zhang Q, McMichael JF, Wyczalkowski MA, Leiserson MD, Miller CA, Welch JS, et al. Mutational landscape and significance across 12 major cancer types. *Nature*. 2013; 502:333–339.
36. Huang W, Sherman BT, Lempicki RA. Systematic and integrative analysis of large gene lists using DAVID bioinformatics resources. *Nat Protoc*. 2009; 4:44–57.
37. Meyer C, Hofmann J, Burmeister T, Groger D, Park TS, Emerenciano M, Pombo de Oliveira M, Renneville A, Villarese P, Macintyre E, Cave H, Clappier E, Mass-Malo K, et al. The MLL recombinome of acute leukemias in 2013. *Leukemia*. 2013; 27:2165–2176.
38. Aubrey BJ, Strasser A, Kelly GL. Tumor-Suppressor Functions of the TP53 Pathway. *Cold Spring Harb Perspect Med*. 2016; 6:6.
39. Morris JP 4th, Wang SC, Hebrok M. KRAS, Hedgehog, Wnt and the twisted developmental biology of pancreatic ductal adenocarcinoma. *Nat Rev Cancer*. 2010; 10:683–695.
40. Ranzani M, Annunziato S, Adams DJ, Montini E. Cancer gene discovery: exploiting insertional mutagenesis. *Mol Cancer Res*. 2013; 11:1141–1158.
41. Abbott KL, Nyre ET, Abraham J, Ho YY, Isaksson Vogel R, Starr TK. The Candidate Cancer Gene Database: a database of cancer driver genes from forward genetic screens in mice. *Nucleic Acids Res*. 2015; 43:D844–848.
42. Takeda H, Wei Z, Koso H, Rust AG, Yew CC, Mann MB. Transposon mutagenesis identifies genes and evolutionary forces driving gastrointestinal tract tumor progression. *Nat Genet*. 2015; 47:142–150.
43. Rahrman EP, Watson AL, Keng VW, Choi K, Moriarity BS, Beckmann DA, Wolf NK, Sarver A, Collins MH, Moertel CL, Wallace MR, Gel B, Serra E, et al. Forward genetic screen for malignant peripheral nerve sheath tumor formation identifies new genes and pathways driving tumorigenesis. *Nat Genet*. 2013; 45:756–766.
44. Perez-Mancera PA, Rust AG, van der Weyden L, Kristiansen G, Li A, Sarver AL, Silverstein KA, Grutzmann R, Aust D, Rummele P, Knosel T, Herd C, Stemple DL, et al. The deubiquitinase USP9X suppresses pancreatic ductal adenocarcinoma. *Nature*. 2012; 486:266–270.
45. Liu Q, Zhang C, Ma G, Zhang Q. Expression of SPRR3 is associated with tumor cell proliferation and invasion in glioblastoma multiforme. *Oncol Lett*. 2014; 7:427–432.
46. Kim JC, Yu JH, Cho YK, Jung CS, Ahn SH, Gong G, Kim YS, Cho DH. Expression of SPRR3 is associated with tumor cell proliferation in less advanced stages of breast cancer. *Breast Cancer Res Treat*. 2012; 133:909–916.
47. de A Simão T, Souza-Santos PT, de Oliveira DS, Bernardo V, Lima SC, Rapozo DC, Krueel CD, Faria PA, Ribeiro Pinto LF, Albano RM. Quantitative evaluation of SPRR3 expression in esophageal squamous cell carcinoma by qPCR and its potential use as a biomarker. *Exp Mol Pathol*. 2011; 91:584–589.
48. Luo H, Lin Y, Gao F, Zhang CT, Zhang R. DEG 10, an update of the database of essential genes that includes both protein-coding genes and noncoding genomic elements. *Nucleic Acids Res*. 2014; 42:D574–80.
49. Georgi B, Voight BF, Bucan M. From mouse to human: evolutionary genomics analysis of human orthologs of essential genes. *PLoS Genet*. 2013; 9:e1003484.
50. Chen WH, Lu G, Chen X, Zhao XM, Bork P. OGEE v2: an update of the online gene essentiality database with special focus on differentially essential genes in human cancer cell lines. *Nucleic Acids Res*. 2017; 45:D940–D944.
51. Luo B, Cheung HW, Subramanian A, Sharifnia T, Okamoto M, Yang X, Hinkle G, Boehm JS, Beroukhim R, Weir BA, Mermel C, Barbie DA, Awad T, et al. Highly parallel identification of essential genes in cancer cells. *Proc Natl Acad Sci USA*. 2008; 105:20380–20385.
52. Yang Z, Bielawski JP. Statistical methods for detecting molecular adaptation. *Trends Ecol Evol*. 2000; 15:496–503.
53. Gray KA, Daugherty LC, Gordon SM, Seal RL, Wright MW, Bruford EA. Genenames.org: the HGNC resources in 2013. *Nucleic Acids Res*. 2013; 41:D545–52.
54. Safran M, Dalah I, Alexander J, Rosen N, Iny Stein T, Shmoish M, Nativ N, Bahir I, Doniger T, Krug H, Sirota-Madi A, Olender T, Golan Y, et al. GeneCards Version 3: the human gene integrator. *Database (Oxford)*. 2010; 2010:baq020.
55. Wang K, Li M, Hakonarson H. ANNOVAR: functional annotation of genetic variants from high-throughput sequencing data. *Nucleic Acids Res*. 2010; 38:e164.
56. Rhodes DR, Kalyana-Sundaram S, Mahavisno V, Varambally R, Yu J, Briggs BB, Barrette TR, Anstet MJ, Kincaid-Beal C, Kulkarni P, Varambally S, Ghosh D, Chinnaiyan AM. OncoPrint 3.0: genes, pathways, and networks in a collection of 18,000 cancer gene expression profiles. *Neoplasia*. 2007; 9:166–180.
57. Krawczak M, Ball EV, Cooper DN. Neighboring-nucleotide effects on the rates of germ-line single-base-pair substitution in human genes. *Am J Hum Genet*. 1998; 63:474–488.
58. Storey JD, Tibshirani R. Statistical significance for genomewide studies. *Proc Natl Acad Sci USA*. 2003; 100:9440–9445.
